# Supplementary material for: Identifying Macrophage-Related Genes in Ulcerative Colitis Using Weighted Coexpression Network Analysis and Machine Learning
Source: Hindawi journal article supplement (doi:10.1155/2023/4373840), 2023-10-25
Supplement: f2 [file 4373840.f2.pdf]

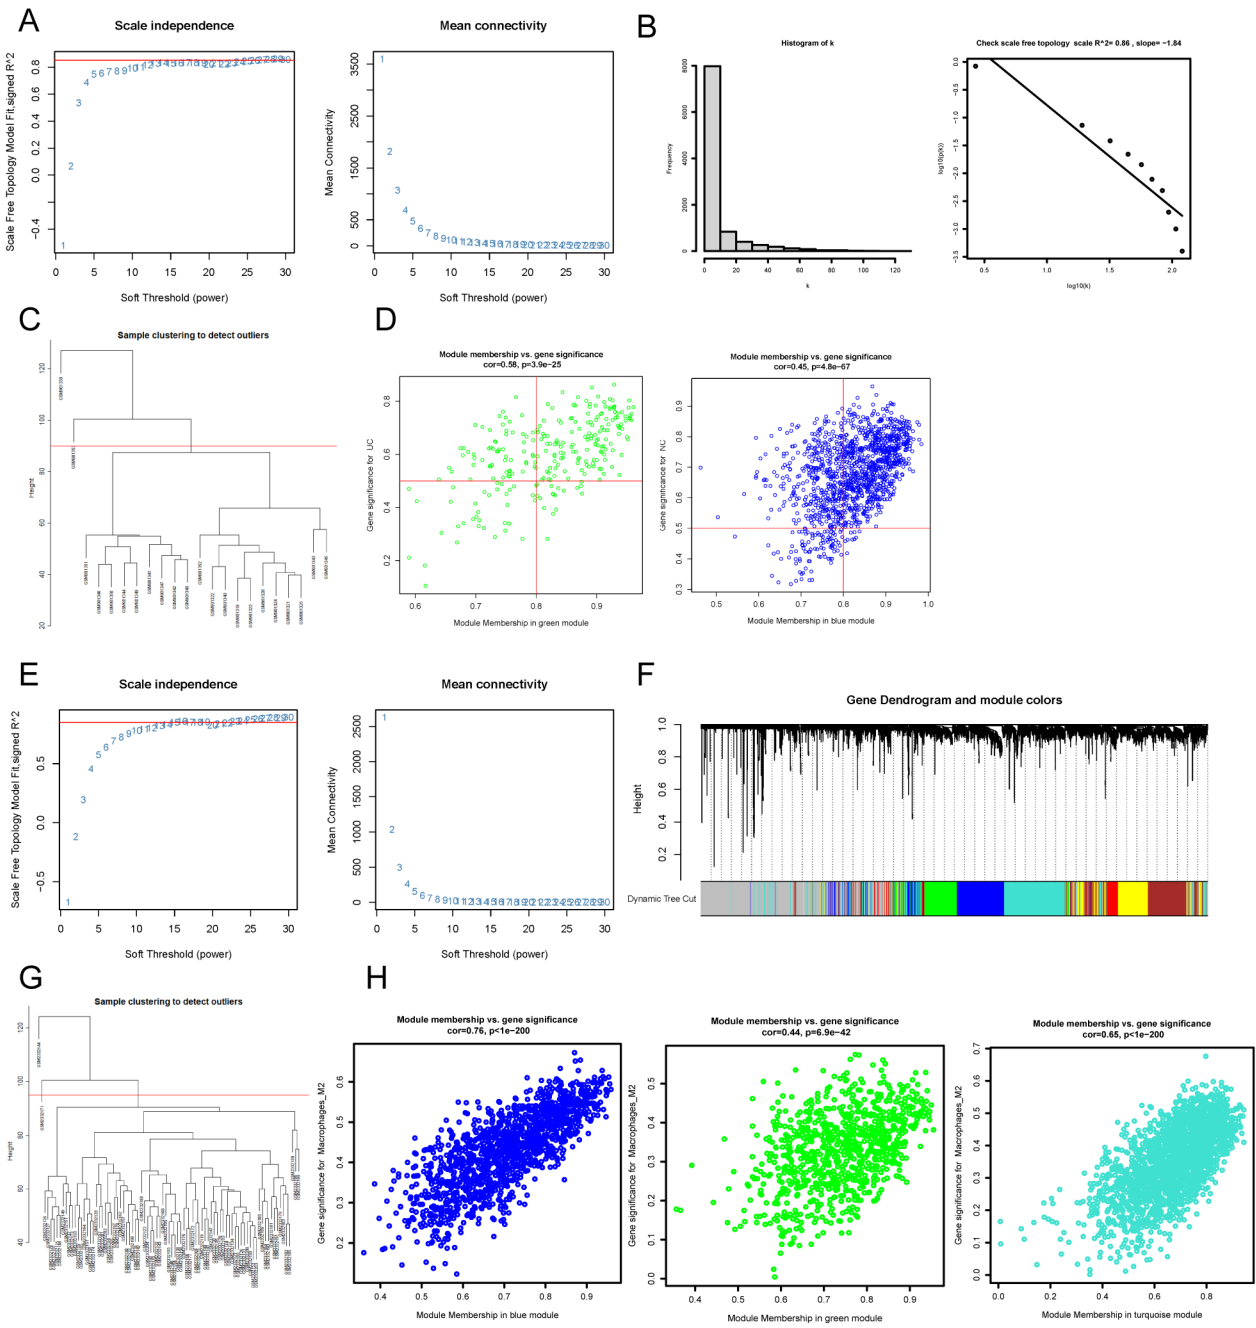

FIG-S1

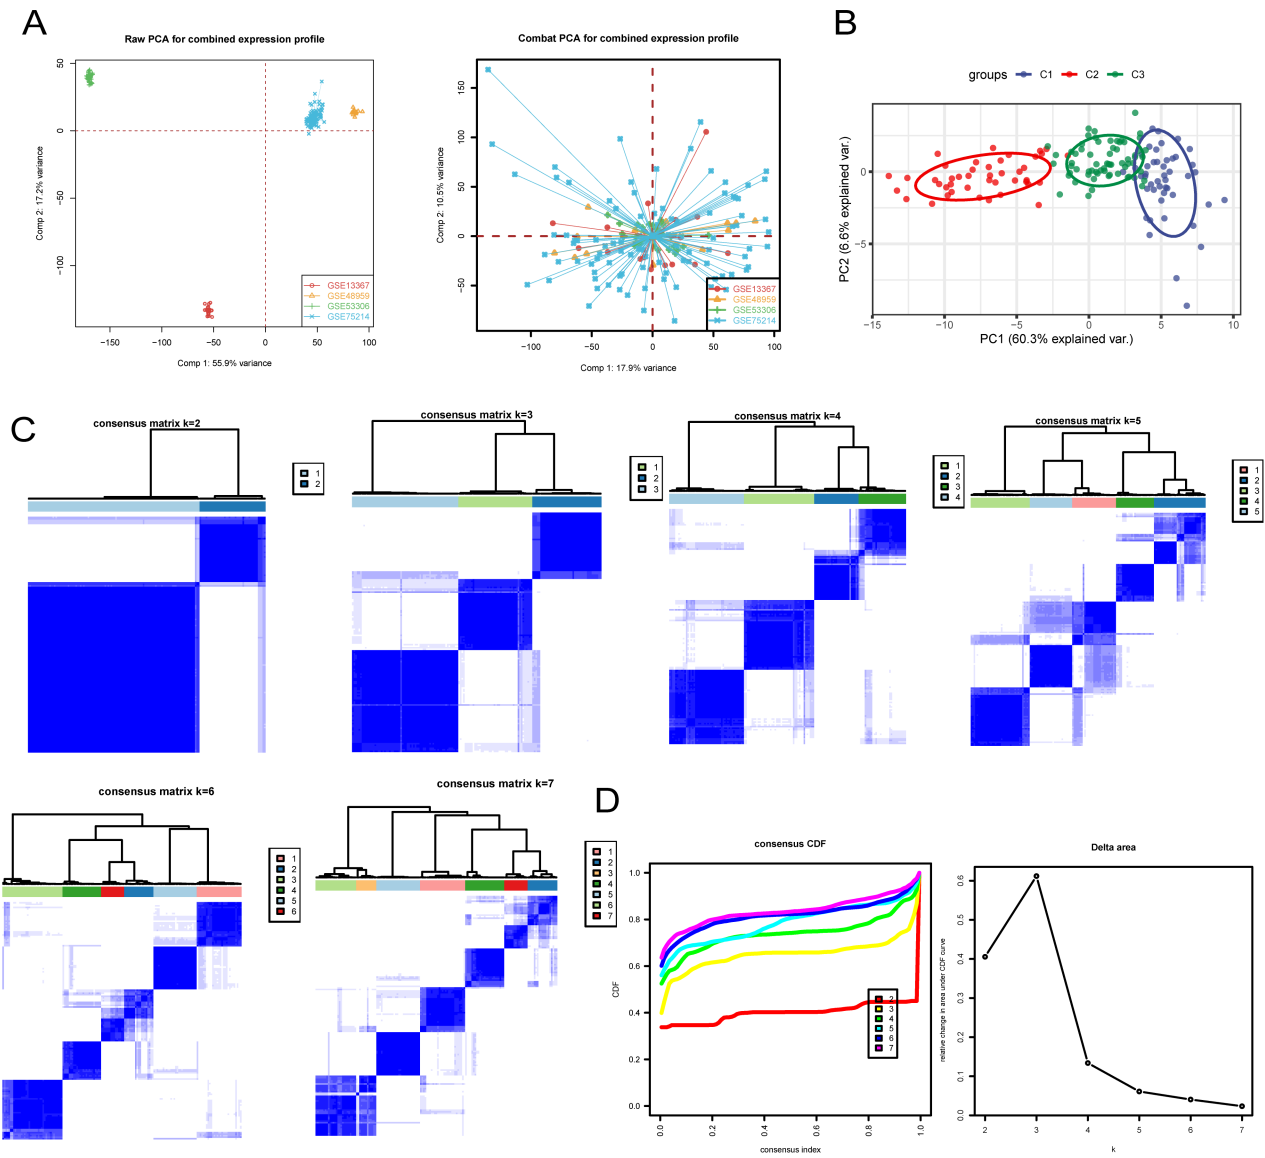

FIG-S2

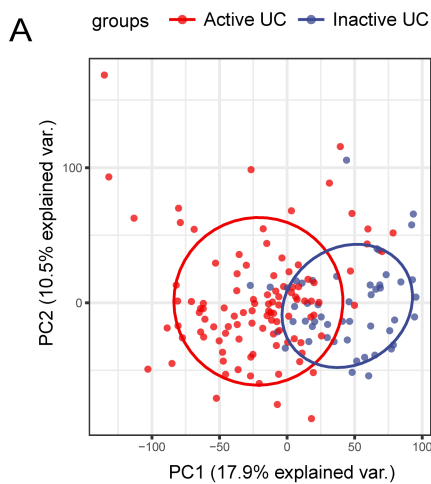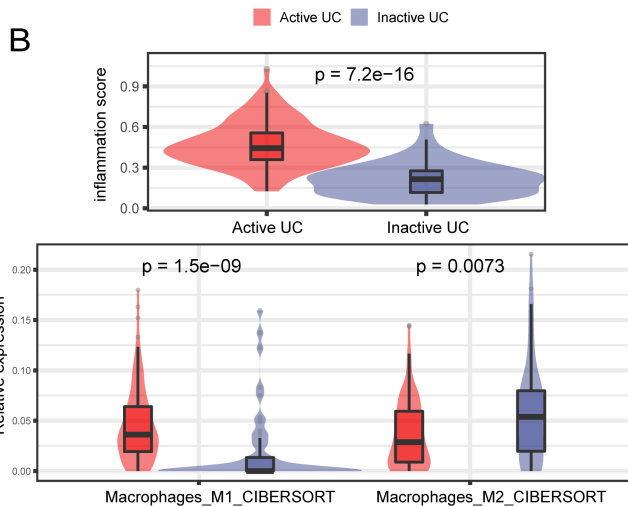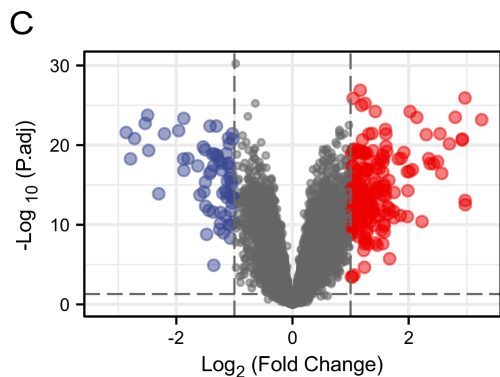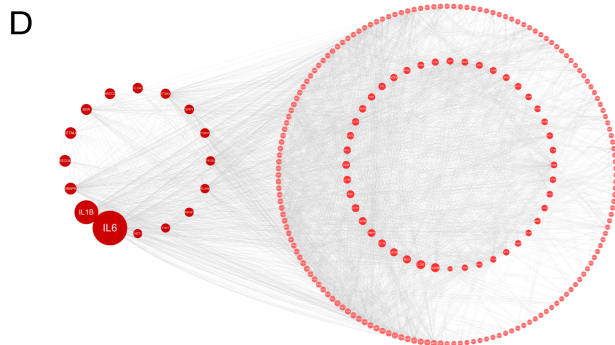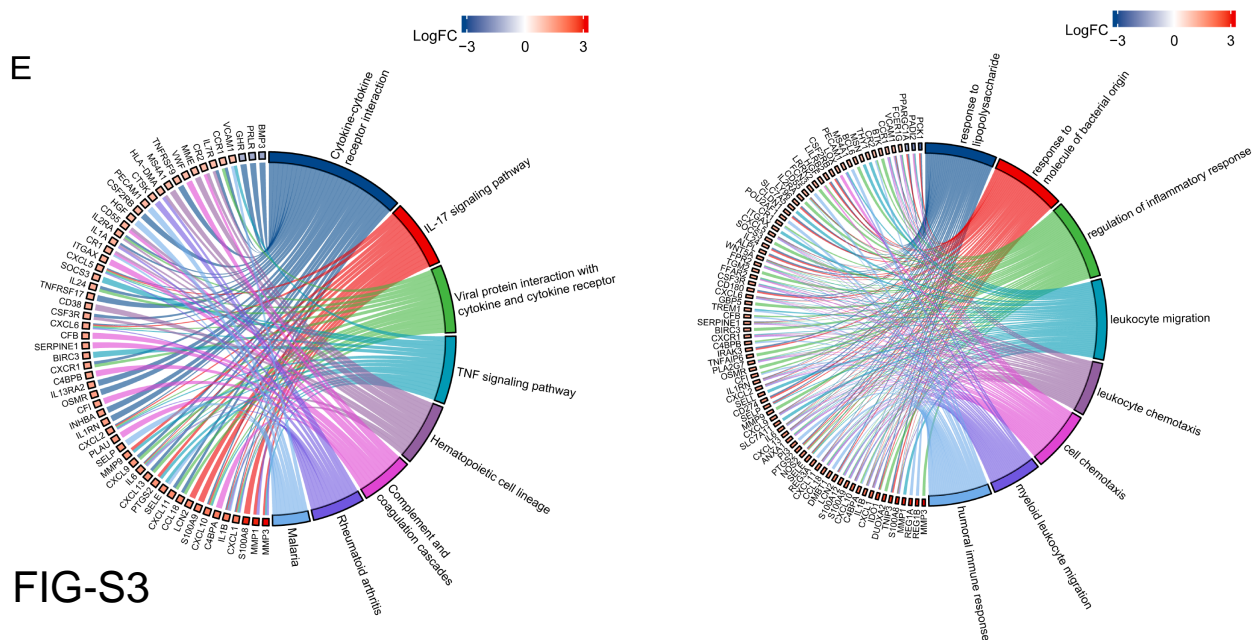

FIG-S3

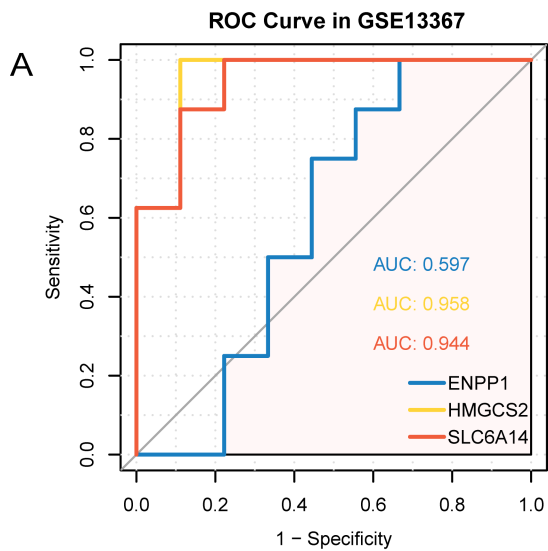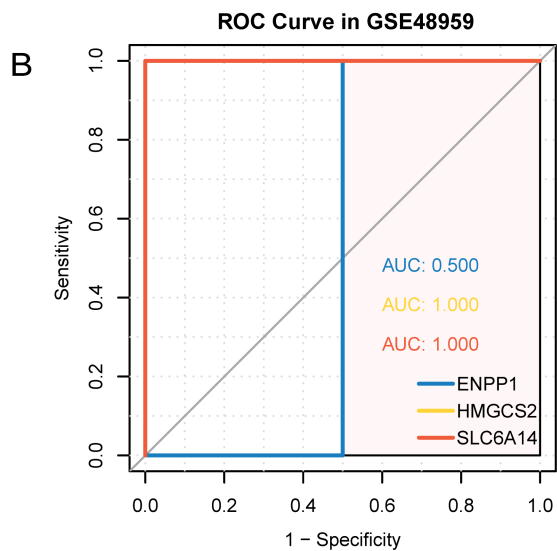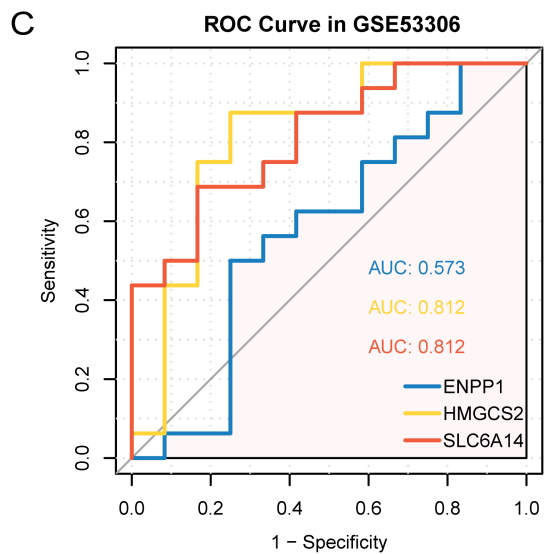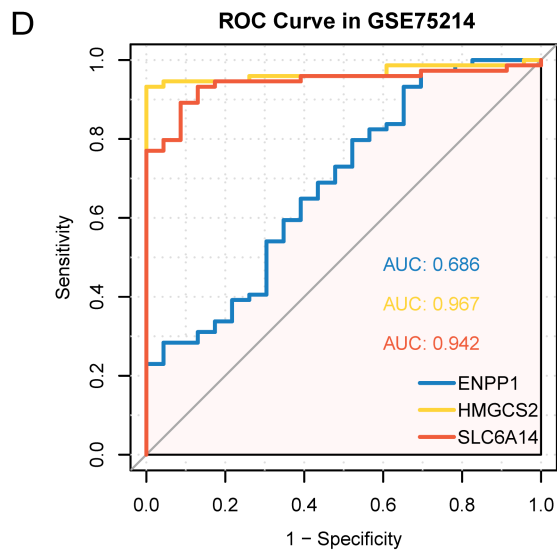

FIG-S4

A

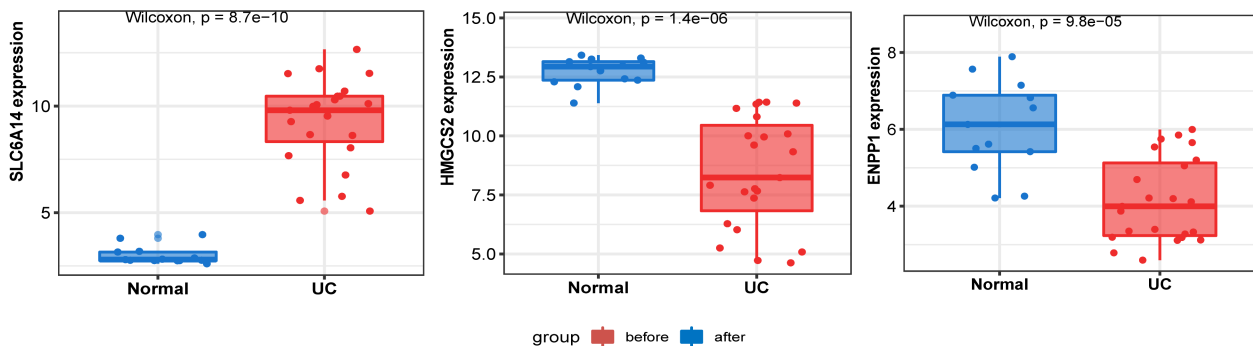

B

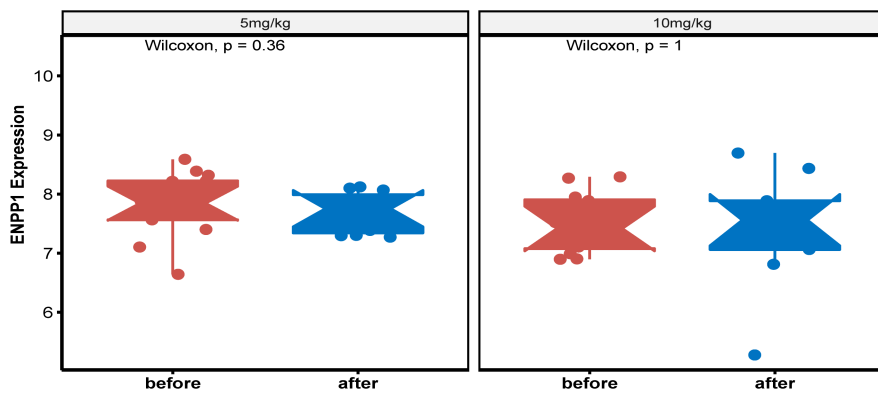

C

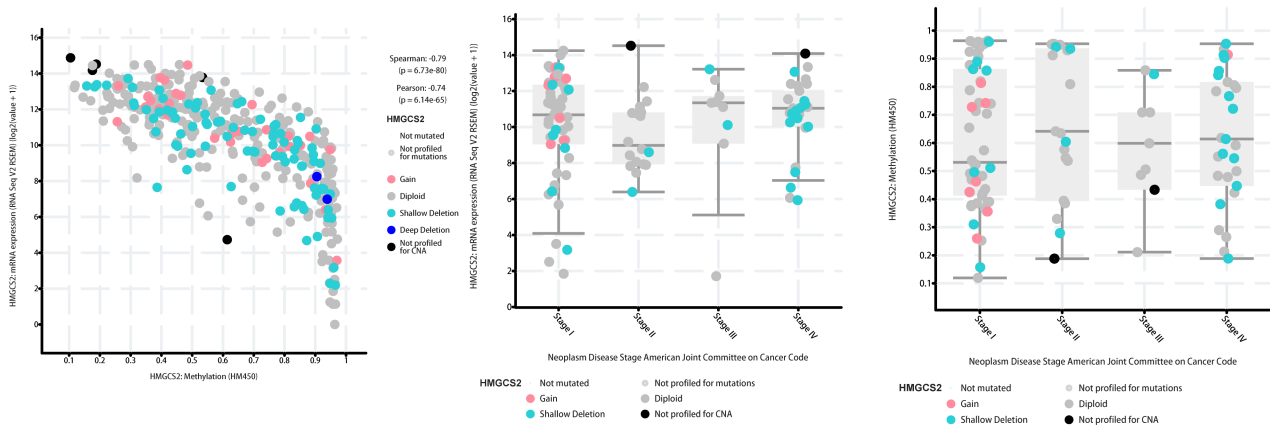

FIG-S5
